# Supplementary material
Source: PubMed Central journal article supplement (PMC7254887)
Supplement: NIHMS1547672-supplement-1.pdf [file NIHMS1547672-supplement-1.pdf]

1 Supplemental files.

2  
3 **Original Pubmed search terms (August 3, 2017)**

4 (((((((("Meta-Analysis"[Publication Type] OR "Meta-Analysis as Topic"[Mesh] OR "Network Meta-Analysis"[Mesh] OR "Meta  
5 Analysis"[Title/Abstract] OR Metaanalysis[Title/Abstract] OR Meta-analysis[Title/Abstract] OR "Meta Analytic Review"[Title/Abstract] OR  
6 Metaanalyses[Title/Abstract] OR Meta-analyses[Title/Abstract]))) AND ("2006"[Date - Publication] : "3000"[Date - Publication])) AND  
7 ((treatment\*[Title/Abstract] OR intervention\*[Title/Abstract] OR program\*[Title/Abstract] OR technique\*[Title/Abstract] OR  
8 therap\*[Title/Abstract] OR strateg\*[Title/Abstract]))) AND ((accept\*[Title/Abstract] OR achievement[Title/Abstract] OR affect[Title/Abstract] OR  
9 "affect regulation"[Title/Abstract] OR agency[Title/Abstract] OR anger[Title/Abstract] OR anxiety[Title/Abstract] OR arousal[Title/Abstract] OR  
10 attention[Title/Abstract] OR autonomic[Title/Abstract] OR avoidance[Title/Abstract] OR "behavior regulation"[Title/Abstract] OR "behaviour  
11 regulation"[Title/Abstract] OR "behavioral regulation"[Title/Abstract] OR "behavioural regulation"[Title/Abstract] OR "body  
12 awareness"[Title/Abstract] OR cogniti\*[Title/Abstract] OR compassion[Title/Abstract] OR concentration[Title/Abstract] OR "conflict  
13 monitoring"[Title/Abstract] OR coping[Title/Abstract] OR decentering[Title/Abstract] OR de-centering[Title/Abstract] OR "decision  
14 making"[Title/Abstract] OR decision-making[Title/Abstract] OR "delay discounting"[Title/Abstract] OR depression[Title/Abstract] OR  
15 detach\*[Title/Abstract] OR discrimination[Title/Abstract] OR dis-identification[Title/Abstract] OR distraction[Title/Abstract] OR "distress  
16 tolerance"[Title/Abstract] OR "distress toleration"[Title/Abstract] OR dissociati\*[Title/Abstract] OR "dot probe"[Title/Abstract] OR  
17 ego[Title/Abstract] OR embodiment[Title/Abstract] OR emotion\*[Title/Abstract] OR "emotion regulation"[Title/Abstract] OR  
18 empath\*[Title/Abstract] OR equanimity[Title/Abstract] OR "executive function"[Title/Abstract] OR "experiential avoidance"[Title/Abstract] OR  
19 fear[Title/Abstract] OR "future orientation"[Title/Abstract] OR "goal setting"[Title/Abstract] OR habit\*[Title/Abstract] OR "identity"[Title/Abstract]  
20 OR impulsiv\*[Title/Abstract] OR kindness[Title/Abstract] OR memory[Title/Abstract] OR meta-awareness[Title/Abstract] OR  
21 metacogniti\*[Title/Abstract] OR meta-cogniti\*[Title/Abstract] OR "mind wandering"[Title/Abstract] OR motivation[Title/Abstract] OR  
22 neuroticism[Title/Abstract] OR nonattachment[Title/Abstract] OR non-attachment[Title/Abstract] OR nonjudgment[Title/Abstract] OR non-  
23 judgment[Title/Abstract] OR nonreactivity[Title/Abstract] OR non-reactivity[Title/Abstract] OR orienting[Title/Abstract] OR  
24 perspective\*[Title/Abstract] OR "positive psychology"[Title/Abstract] OR "problem solve"[Title/Abstract] OR "problem solving"[Title/Abstract] OR  
25 prosocial[Title/Abstract] OR "psychological distance"[Title/Abstract] OR "psychological flexibility"[Title/Abstract] OR reapprais\*[Title/Abstract]  
26 OR reconsolidation[Title/Abstract] OR reperceiving[Title/Abstract] OR re-perceiving[Title/Abstract] OR resilience[Title/Abstract] OR "resource  
27 depletion"[Title/Abstract] OR reward[Title/Abstract] OR ruminat\*[Title/Abstract] OR "Self-Control"[Mesh] OR "self-control"[Title/Abstract] OR  
28 "self control"[Title/Abstract] OR self-monitor\*[Title/Abstract] OR self-regulat\*[Title/Abstract] OR "self regulation"[Title/Abstract] OR  
29 worry[Title/Abstract] OR "selective stopping"[Title/Abstract] OR "stimulus prioritization"[Title/Abstract] OR "stop signal"[Title/Abstract] OR  
30 stress[Title/Abstract] OR stroop[Title/Abstract] OR "Sustained Attention to Response Task"[Title/Abstract] OR sympathetic[Title/Abstract] OR top-  
31 down[Title/Abstract] OR "task switching"[Title/Abstract] OR threat[Title/Abstract] OR vigilance[Title/Abstract]))) AND (("Behavior and Behavior  
32 Mechanisms"[Mesh] OR "Health Behavior"[Mesh] OR "health behavior"[Title/Abstract] OR "health behavior"[Title/Abstract] OR "behavior  
33 change"[Title/Abstract] OR "behaviour change"[Title/Abstract] OR "behavioral health"[Title/Abstract] OR "behavioural health"[Title/Abstract] OR  
34 "Healthy Lifestyle"[Mesh] OR diet[Title/Abstract] OR nutrition[Title/Abstract] OR "physical activity"[Title/Abstract] OR exercise[Title/Abstract]

1 OR fitness[Title/Abstract] OR yoga[Title/Abstract] OR meditation[Title/Abstract] OR mindfulness[Title/Abstract] OR "Mind-Body  
 2 Therapies"[Mesh] OR anxiety[Title/Abstract] OR "Anxiety"[Mesh] OR "Anxiety Disorders"[Mesh] OR depression[Title/Abstract] OR  
 3 "Depression"[Mesh] OR "Depressive Disorder"[Mesh] OR stress[Title/Abstract] OR "Mental Health"[Mesh] OR "mental wellbeing"[Title/Abstract]  
 4 OR "mental well being"[Title/Abstract] OR "mental well-being"[Title/Abstract] OR "Stress, Psychological"[Mesh] OR "Resilience,  
 5 Psychological"[Mesh] OR resilience[Title/Abstract] OR "Adaptation, Psychological"[Mesh] OR coping[Title/Abstract] OR "Sleep"[Mesh] OR  
 6 sleep[Title/Abstract] OR "Fatigue"[Mesh] OR fatigue[Title/Abstract] OR "substance abuse"[Title/Abstract] OR "substance use  
 7 disorder"[Title/Abstract] OR "drug abuse" OR "alcohol abuse"[Title/Abstract] OR "drug dependence"[Title/Abstract] OR "alcohol  
 8 dependence"[Title/Abstract] OR "Smoking Cessation"[Mesh] OR smoking[Title/Abstract] OR tobacco[Title/Abstract] OR cigarette\*[Title/Abstract]  
 9 OR "nicotine dependence"[Title/Abstract] OR "Oral Hygiene"[Mesh] OR "oral health"[Title/Abstract] OR "oral hygiene"[Title/Abstract] OR  
 10 "medication adherence"[Title/Abstract] OR "medical regimen adherence"[Title/Abstract] OR "medication compliance"[Title/Abstract] OR  
 11 "medication adherence"[MESH] OR "medication persistence"[Title/Abstract] OR "drug compliance"[Title/Abstract] OR "drug  
 12 adherence"[Title/Abstract] OR "drug persistence"[Title/Abstract] OR "pharmacotherapy compliance"[Title/Abstract] OR "pharmacotherapy  
 13 adherence"[Title/Abstract] OR "heart-rate variability"[Title/Abstract] OR "heart rate variability"[Title/Abstract] OR "allostatic load"[Title/Abstract]  
 14 OR "blood pressure"[Title/Abstract] OR "body mass index"[Title/Abstract] OR cortisol[Title/Abstract])])])]) NOT animal[Filter]

#### 16 Updated PubMed search terms (2017 – March 2019)

17 ("Meta-Analysis"[Publication Type] OR "Meta-Analysis as Topic"[Mesh] OR "Network Meta-Analysis"[Mesh] OR "Meta Analysis"[Title/Abstract]  
 18 OR Metaanalysis[Title/Abstract] OR Meta-analysis[Title/Abstract] OR "Meta Analytic Review"[Title/Abstract] OR Metaanalyses[Title/Abstract]  
 19 OR Meta-analyses[Title/Abstract]))  
 20 AND ("2017"[Date - Publication] : "3000"[Date - Publication]))  
 21 AND ((treatment\*[Title/Abstract] OR intervention\*[Title/Abstract] OR program\*[Title/Abstract] OR technique\*[Title/Abstract] OR  
 22 therap\*[Title/Abstract] OR strateg\*[Title/Abstract]))  
 23 AND ((accept\*[Title/Abstract] OR achievement[Title/Abstract] OR affect[Title/Abstract] OR "affect regulation"[Title/Abstract] OR  
 24 agency[Title/Abstract] OR anger[Title/Abstract] OR anxiety[Title/Abstract] OR arousal[Title/Abstract] OR attention[Title/Abstract] OR  
 25 autonomic[Title/Abstract] OR avoidance[Title/Abstract] OR "behavior regulation"[Title/Abstract] OR "behaviour regulation"[Title/Abstract] OR  
 26 "behavioral regulation"[Title/Abstract] OR "behavioural regulation"[Title/Abstract] OR "body awareness"[Title/Abstract] OR  
 27 cogniti\*[Title/Abstract] OR compassion[Title/Abstract] OR concentration[Title/Abstract] OR "conflict monitoring"[Title/Abstract] OR  
 28 coping[Title/Abstract] OR decentering[Title/Abstract] OR de-centering[Title/Abstract] OR "decision making"[Title/Abstract] OR decision-  
 29 making[Title/Abstract] OR "delay discounting"[Title/Abstract] OR depression[Title/Abstract] OR detach\*[Title/Abstract] OR  
 30 discrimination[Title/Abstract] OR dis-identification[Title/Abstract] OR distraction[Title/Abstract] OR "distress tolerance"[Title/Abstract] OR  
 31 "distress toleration"[Title/Abstract] OR dissociati\*[Title/Abstract] OR "dot probe"[Title/Abstract] OR ego[Title/Abstract] OR  
 32 embodiment[Title/Abstract] OR emotion\*[Title/Abstract] OR "emotion regulation"[Title/Abstract] OR empath\*[Title/Abstract] OR  
 33 equanimity[Title/Abstract] OR "executive function"[Title/Abstract] OR "experiential avoidance"[Title/Abstract] OR fear[Title/Abstract] OR "future  
 34 orientation"[Title/Abstract] OR "goal setting"[Title/Abstract] OR habit\*[Title/Abstract] OR "identity"[Title/Abstract] OR impulsiv\*[Title/Abstract]

1 OR kindness[Title/Abstract] OR memory[Title/Abstract] OR meta-awareness[Title/Abstract] OR metacogniti\*[Title/Abstract] OR meta-  
2 cogniti\*[Title/Abstract] OR "mind wandering"[Title/Abstract] OR motivation[Title/Abstract] OR neuroticism[Title/Abstract] OR  
3 nonattachment[Title/Abstract] OR non-attachment[Title/Abstract] OR nonjudgment[Title/Abstract] OR non-judgment[Title/Abstract] OR  
4 nonreactivity[Title/Abstract] OR non-reactivity[Title/Abstract] OR orienting[Title/Abstract] OR perspective\*[Title/Abstract] OR "positive  
5 psychology"[Title/Abstract] OR "problem solve"[Title/Abstract] OR "problem solving"[Title/Abstract] OR prosocial[Title/Abstract] OR  
6 "psychological distance"[Title/Abstract] OR "psychological flexibility"[Title/Abstract] OR reapprais\*[Title/Abstract] OR  
7 reconsolidation[Title/Abstract] OR re-perceiving[Title/Abstract] OR re-perceiving[Title/Abstract] OR resilience[Title/Abstract] OR "resource  
8 depletion"[Title/Abstract] OR reward[Title/Abstract] OR ruminat\*[Title/Abstract] OR "Self-Control"[Mesh] OR "self-control"[Title/Abstract] OR  
9 "self control"[Title/Abstract] OR self-monitor\*[Title/Abstract] OR self-regulat\*[Title/Abstract] OR "self regulation"[Title/Abstract] OR  
10 worry[Title/Abstract] OR "selective stopping"[Title/Abstract] OR "stimulus prioritization"[Title/Abstract] OR "stop signal"[Title/Abstract] OR  
11 stress[Title/Abstract] OR stroop[Title/Abstract] OR "Sustained Attention to Response Task"[Title/Abstract] OR sympathetic[Title/Abstract] OR top-  
12 down[Title/Abstract] OR "task switching"[Title/Abstract] OR threat[Title/Abstract] OR vigilance[Title/Abstract]))))  
13 AND (("Behavior and Behavior Mechanisms"[Mesh] OR "Health Behavior"[Mesh] OR "health behavior"[Title/Abstract] OR "health  
14 behavior"[Title/Abstract] OR "behavior change"[Title/Abstract] OR "behaviour change"[Title/Abstract] OR "behavioral health"[Title/Abstract] OR  
15 "behavioural health"[Title/Abstract] OR "Healthy Lifestyle"[Mesh] OR diet[Title/Abstract] OR nutrition[Title/Abstract] OR "physical  
16 activity"[Title/Abstract] OR exercise[Title/Abstract] OR fitness[Title/Abstract] OR yoga[Title/Abstract] OR meditation[Title/Abstract] OR  
17 mindfulness[Title/Abstract] OR "Mind-Body Therapies"[Mesh] OR "medication adherence"[Title/Abstract] OR "medical regimen  
18 adherence"[Title/Abstract] OR "medication compliance"[Title/Abstract] OR "medication adherence"[MESH] OR "medication  
19 persistence"[Title/Abstract] OR "drug compliance"[Title/Abstract] OR "drug adherence"[Title/Abstract] OR "drug persistence"[Title/Abstract] OR  
20 "pharmacotherapy compliance"[Title/Abstract] OR "pharmacotherapy adherence"[Title/Abstract] OR "ART compliance" OR "ART adherence" OR  
21 "therapy non-compliance"[Title/Abstract] OR "medication non-adherence"[Title/Abstract] OR "medical regimen non-adherence"[Title/Abstract] OR  
22 "medication non-compliance"[Title/Abstract] OR "medication non-adherence"[MESH] OR "drug non-compliance"[Title/Abstract] OR "drug non-  
23 adherence"[Title/Abstract] OR "pharmacotherapy non-compliance"[Title/Abstract] OR "pharmacotherapy non-adherence"[Title/Abstract] OR "ART  
24 non-compliance"[Title/Abstract] OR "ART non-adherence"[Title/Abstract]

25  
26  
27  
28  
29  
30  
31  
32  
33  
34

Table S1.

Results of methodological quality for each meta-analysis using the AMSTAR 2 instrument

|                           | PICO | Type of study design | Participants/setting | Intervention(s) | Comparator(s) | Outcome(s) | Protocol | Study design criteria | Searched at least 2 DB | Provided key word/search strategy | Justified publication restrictions | Searched ref. lists of included studies | Searched trial/registries | Consulted experts in the field | Search grey lit (where relevant) | Searched within 2 years of publication | Literature search | Study selection | Coding | Excluded studies | PRISMA* | Included studies - detail | RoB - RCTs | RoB - NRSIs | Funding sources | Meta-analysis methods - RCTs | Meta-analysis methods - NRSIs | Assess RoB impact | Incorporate RoB | Heterogeneity | Publication bias | COIs reported | AMSTAR 2 score (% items complete) |
|---------------------------|------|----------------------|----------------------|-----------------|---------------|------------|----------|-----------------------|------------------------|-----------------------------------|------------------------------------|-----------------------------------------|---------------------------|--------------------------------|----------------------------------|----------------------------------------|-------------------|-----------------|--------|------------------|---------|---------------------------|------------|-------------|-----------------|------------------------------|-------------------------------|-------------------|-----------------|---------------|------------------|---------------|-----------------------------------|
| Conn et al., 2015         | Y    | X                    | X                    | X               |               | X          | N        | N                     | X                      | X                                 | X                                  |                                         | X                         |                                | X                                |                                        | PY                | N               | N      | N                | Y       | N                         | PY         | N           | N               | Y                            | N                             | Y                 | Y               | Y             | Y                | Y             | 0.44                              |
| Conn & Ruppap, 2017       | N    |                      | X                    | X               |               | X          | N        | N                     | X                      | X                                 |                                    | X                                       | X                         | X                              | X                                | X                                      | N                 | N               | Y      | N                | Y       | PY                        | N          | N           | N               | Y                            | N                             | N                 | N               | Y             | Y                | Y             | 0.31                              |
| Ruppap et al., 2017       | Y    | X                    | X                    | X               |               | X          | N        | Y                     | X                      | X                                 | X                                  | X                                       | X                         | X                              | X                                | X                                      | Y                 | N               | Y      | N                | Y       | N                         | PY         | NA          | Y               | Y                            | NA                            | Y                 | N               | N             | Y                | Y             | 0.59                              |
| Fletcher et al., 2015     | Y    | X                    | X                    | X               |               | X          | Y        | N                     | X                      | X                                 | X                                  | X                                       | X                         |                                | X                                | X                                      | PY                | Y               | Y      | N                | Y       | Y                         | Y          | N           | N               | Y                            | N                             | N                 | N               | Y             | N                | Y             | 0.53                              |
| Chase et al., 2016        | N    |                      | X                    | X               | X             | X          | N        | N                     | X                      | X                                 | X                                  | X                                       | X                         | X                              |                                  |                                        | PY                | N               | Y      | N                | N       | N                         | PY         | N           | N               | Y                            | N                             | Y                 | N               | Y             | N                | Y             | 0.33                              |
| Demonceau et al., 2013    | Y    | X                    | X                    | X               | X             | X          | N        | N                     | X                      | X                                 |                                    |                                         |                           |                                |                                  | X                                      | N                 | Y               | Y      | N                | Y       | PY                        | Y          | NA          | N               | Y                            | NA                            | Y                 | Y               | Y             | Y                | Y             | 0.66                              |
| Denford et al., 2014      | Y    | X                    | X                    | X               | X             | X          | N        | N                     | X                      | X                                 | X                                  | X                                       | X                         |                                | X                                | X                                      | PY                | N               | Y      | N                | Y       | PY                        | Y          | NA          | N               | Y                            | NA                            | Y                 | Y               | Y             | Y                | Y             | 0.63                              |
| Conn et al., 2009         | Y    | X                    | X                    | X               |               | X          | N        | Y                     | X                      | X                                 |                                    | X                                       | X                         |                                | X                                | X                                      | N                 | N               | Y      | N                | N       | PY                        | N          | NA          | N               | Y                            | NA                            | N                 | N               | Y             | Y                | N             | 0.41                              |
| Pellowski et al., 2018    | Y    | X                    | X                    | X               |               | X          | N        | Y                     | X                      | X                                 |                                    |                                         |                           |                                | X                                | X                                      | N                 | N               | Y      | N                | Y       | Y                         | PY         | NA          | N               | N                            | NA                            | Y                 | Y               | Y             | Y                | Y             | 0.59                              |
| Sakakibara et al., 2017   | Y    | X                    | X                    | X               | X             | X          | N        | N                     | X                      | X                                 |                                    | X                                       |                           |                                |                                  | X                                      | N                 | N               | N      | N                | Y       | N                         | Y          | NA          | N               | N                            | NA                            | Y                 | N               | Y             | N                | Y             | 0.31                              |
| Kassavou & Sutton, 2018   | Y    | X                    | X                    | X               | X             | X          | N        | N                     | X                      | X                                 |                                    | X                                       | X                         |                                |                                  | X                                      | N                 | N               | Y      | Y                |         | Y                         | Y          | NA          | N               | Y                            | NA                            | N                 | N               | Y             | Y                | Y             | 0.56                              |
| Seewoodharry et al., 2017 | Y    | X                    | X                    | X               |               | X          | N        | Y                     | X                      | X                                 | X                                  | X                                       |                           |                                |                                  | X                                      | PY                | Y               | Y      | N                | Y       | Y                         | PY         | NA          | N               | Y                            | NA                            | N                 | N               | Y             | Y                | Y             | 0.63                              |

Note. NA = Not applicable. N = No. NRSI = Non-randomized studies of interventions. PICO = Defined Problem/Patient/Population, Intervention/Indicator, Comparison, Outcome. PRISMA: Moher et al.'s reporting standards. PY = Partial Yes. RCT = Randomized controlled trial. RoB = Risk of bias. Y = Yes. X = Item was reported by review authors and was used to determine AMSTAR 2 tool item rating.

Table S2.

*Outcomes for all BCT mechanisms examined in included reviews*

| Citation                      | Type of mechanism            | Outcome                                                   | k with | ES with BCT [95% CI] or (SE) | k w/o | ES without BCT [95% CI] or (SE) | Q-Between, Z, and/or p-value between groups | Heterogeneity                                                        | Results                                 |
|-------------------------------|------------------------------|-----------------------------------------------------------|--------|------------------------------|-------|---------------------------------|---------------------------------------------|----------------------------------------------------------------------|-----------------------------------------|
| <b>Prompt self-monitoring</b> |                              |                                                           |        |                              |       |                                 |                                             |                                                                      |                                         |
| Chase et al., 2016            | Of medications               | MA                                                        | 3      | d = 0.492, SE= 0.267         | 25    | d = 0.195, SE= 0.045            | QB= 1.198, p= 0.274                         |                                                                      | NS diff. between BCT and non-BCT groups |
| Conn & Ruppar, 2017           | Of medication behavior       | MA to medications prescribed by health care providers (a) | 63     | NR                           | NA    |                                 |                                             | NR                                                                   | No advantage for BCT                    |
| Conn & Ruppar, 2017           | Of medication behavior       | MA to medications prescribed by health care providers (a) | 98     | NR                           | NA    |                                 |                                             | NR                                                                   | No advantage for BCT                    |
| Conn et al., 2009             | Of medication effects        | MA                                                        | 3      | 1.18                         | NR    |                                 | 0.30 p< .001                                |                                                                      | Sig. Diff. for BCT present NS diff.     |
| Conn et al., 2015             | Of medication administration | MA                                                        | 16     | d = 0.381                    | 92    | d = 0.280                       | Q = 0.438, p = 0.508                        | Q= 0.438, p= 0.508, SE= 0.148                                        | between BCT and non-BCT groups NS diff. |
| Conn et al., 2015             | Of blood pressure            | MA                                                        | 36     | d = 0.381                    | 72    | d = 0.261                       | Q = 1.974, p = 0.160                        | Q= 1.974, p= 0.160, SE= 0.072<br>Q= 20.88, p=0.05, T2=0.02, I2 = 43% | between BCT and non-BCT groups          |
| Fletcher et al., 2015         | Of blood pressure            | MA                                                        | 13     | d = 0.21 [0.08, 0.34]        | NA    |                                 |                                             |                                                                      | Sig. Diff. for BCT present NS diff.     |
| Ruppar et al., 2017           | Of medications and signs     | Antihypertensive MA                                       | 14     | d = 0.41 [0.22,0.60]         | 31    | d = 0.28 [0.10, 0.46]           | Q= 0.88, p=0.349                            |                                                                      | between BCT and non-BCT groups          |
| Ruppar et al., 2017           | Of medications and signs     | Antihypertensive MA                                       | 9      | d = 0.16 [0.03, 0.29]        | 36    | d = 0.35 [0.19, 0.51]           | Q= 3.40, p= 0.065                           |                                                                      | No advantage for BCT (worsens)          |

**Provide feedback**

|                           |                                                                                                       |                                                                            |                              |    |                         |                     |                                  |                                                                                                                  |  |
|---------------------------|-------------------------------------------------------------------------------------------------------|----------------------------------------------------------------------------|------------------------------|----|-------------------------|---------------------|----------------------------------|------------------------------------------------------------------------------------------------------------------|--|
| Conn & Ruppap, 2017       | On MA behavior and disease signs/symptoms related to MA                                               | MA to medications prescribed by health care providers (a)                  | 56 NR                        |    |                         |                     |                                  | No advantage for BCT<br>NS diff.<br>between BCT and non-BCT groups<br>NS diff.<br>between BCT and non-BCT groups |  |
| Conn et al., 2015         | On adherence scores                                                                                   | MA                                                                         | d = 0.500, SE= 14 0.143      | NA | d = 0.280               | p= 0.140            | Q= 2.180, p= 0.140,              |                                                                                                                  |  |
| Conn et al., 2015         | On blood pressure                                                                                     | MA                                                                         | d = 0.298, SE= 14 0.069      | NA | d = 0.296               | p= 0.974            | Q= 0.001, p= 0.974               |                                                                                                                  |  |
| Demonceau et al., 2013    | EM-adherence feedback                                                                                 | MA assessed with any kind of electronic medication-event monitoring system | 19.8% [10.7, 22 28.9%]       | NA | 10.3% [7.5, 13.1%]      |                     |                                  | Sig. Diff. for BCT present<br>NS diff.<br>between BCT and non-BCT groups                                         |  |
| Denford et al., 2014      | Nspec<br>Use of objective or subjective measures of adherence as a guide to provide specific feedback | MA to preventative asthma medication                                       | 6 2.70 [1.60, 4.57]          |    | 10 2.53 [2.05, 3.13]    | p = 0.85            | difftau2 = 0                     |                                                                                                                  |  |
| Seewoodharry et al., 2017 | on improving adherence                                                                                | MA (mean percentage adherence)                                             | 10.02 [95% 6 CI=3.15, 16.89] | NA |                         |                     | I2 = 26.3%, p=0.237; Tau = 5.335 | Sig. Diff. for BCT present                                                                                       |  |
| <b>Goal setting</b>       |                                                                                                       |                                                                            |                              |    |                         |                     |                                  |                                                                                                                  |  |
| Chase et al., 2016        | Nspec<br>Subject-generated written or oral medication adherence behavioral goals                      | MA                                                                         | d = 0.183, SE= 5 0.135       |    | 23 d = 0.227, SE= 0.050 | QB= 0.095, p= 0.758 |                                  | NS diff.<br>between BCT and non-BCT groups                                                                       |  |
| Conn & Ruppap, 2017       |                                                                                                       | MA to medications prescribed by health care providers (a)                  | 87 NR                        | NA |                         |                     |                                  | No advantage for BCT                                                                                             |  |

- sometimes with  
action plans

|                                   |                                                                  |                                                           |                           |    |                          |                       |                                                              |
|-----------------------------------|------------------------------------------------------------------|-----------------------------------------------------------|---------------------------|----|--------------------------|-----------------------|--------------------------------------------------------------|
| Denford et al., 2014              | Nspec                                                            | MA to preventative asthma medication                      | OR = 2.60 [2.04, 9 3.32]  |    | OR = 2.58 [1.78, 7 3.84] | p= 0.97, Diff Tau2=0% | NS diff. between BCT and non-BCT groups                      |
| Pellowski et al., 2018            | Nspec                                                            | ART MA                                                    | 3 d = -0.09               | NA |                          | NR                    | No advantage for BCT                                         |
| <b>Barrier ID/problem solving</b> |                                                                  |                                                           |                           |    |                          |                       |                                                              |
| Chase et al., 2016                | Patients with CAD Specifically address adherence problem solving | MA                                                        | 6 d= 0.188, SE= 0.08      |    | 22 d= 0.245, SE= 0.054   | QB= 0.307, p= 0.580   | No advantage for BCT NS diff. between BCT and non-BCT groups |
| Conn et al., 2015                 | Specifically address barriers to adherence                       | MA                                                        | d = 0.152, SE= 21 0.066   |    | d = 0.334, SE = 87 0.047 | Qb= 5.032, p= 0.025   | NS diff. between BCT and non-BCT groups                      |
| Conn et al., 2015                 | Barriers management/Problem solving                              | MA to medications prescribed by health care providers (a) | d = 0.161, SE= 14 0.094   |    | d = 0.321, SE = 94 0.044 | Qb= 2.383, p= 0.123   | NS diff. between BCT and non-BCT groups                      |
| Conn & Ruppap, 2017               | Barriers management/Problem solving                              | MA to medications prescribed by health care providers (a) | 281 p = 0.025             | NA |                          |                       | No advantage for BCT                                         |
| Conn & Ruppap, 2017               | Barriers management/Problem solving                              | MA to medications prescribed by health care providers (a) | 281 p = 0.006             | NA |                          |                       | No advantage for BCT NS diff. between BCT and non-BCT groups |
| Denford et al., 2014              | Nspec                                                            | MA to preventative asthma medication                      | OR = 2.54 [1.98, 12 3.25] |    | OR = 3.13 [1.96, 4 4.99] | p= 0.37, Diff Tau2=0% | NS diff. between BCT and non-BCT groups                      |
| Kassavou & Sutton, 2018           | problem solving BCT                                              | MA                                                        | 3 NR                      | NA |                          |                       | No advantage for BCT                                         |
| Pellowski et al., 2018            | Discussion of barriers/facilitators/strategies                   | ART MA                                                    | 8 d = 0.34, p = 0.18      | NA |                          | NR                    | No advantage for BCT                                         |
| <b>Self-management</b>            |                                                                  |                                                           |                           |    |                          |                       |                                                              |

|                          |                                            |                                                           |    |                       |    |                                           |                            |
|--------------------------|--------------------------------------------|-----------------------------------------------------------|----|-----------------------|----|-------------------------------------------|----------------------------|
| Sakakibara et al., 2017  | Self-management interventions              | MA                                                        | 5  | d = 0.31 [0.07, 0.56] | NA | Chi2 = 5.25, df = 4, (p = 0.26), I2 = 24% | Sig. Diff. for BCT present |
| <b>Stress management</b> |                                            |                                                           |    |                       |    |                                           |                            |
| Conn & Ruppert, 2017     | Teaching subjects stress-reduction methods | MA to medications prescribed by health care providers (a) | 33 | NR                    | NA |                                           | No advantage for BCT       |
| Pellowski et al., 2018   | Coping                                     | ART MA                                                    | 5  | d = 0.08, p = 0.77    | NA | NR                                        | No advantage for BCT       |

*Note.* ART = Antiretroviral therapy. BCT = Behavior change technique. CI = Confidence interval. ES = Effect size. EM = Electronically monitored. k with = Number of studies with the self-regulation component. k w/o = Number of studies without the self-regulation component. MA = Medication adherence. NA = Not applicable. NR = Not reported. NS = Non-significant difference. Nspec = Not specified. OR = Odds ratio. SE = Standard error. (a) Not contraceptive/sexual function medications.

1  
2  
3  
4  
5  
6  
7  
8
